# Supplementary material for: A solution-processed TiS2/organic hybrid superlattice film towards flexible thermoelectric devices
Source: Royal Society of Chemistry journal article supplement (doi:10.1039/c6ta08838d), 2016-11-10
Supplement: c6ta08838d1.pdf [file c6ta08838d1.pdf]

## Supplementary Information

### A solution-processed TiS<sub>2</sub>/organic hybrid superlattice film towards flexible thermoelectric devices

Ruoming Tian<sup>1</sup>, Chunlei Wan<sup>2</sup>, Yifeng Wang<sup>3</sup>, Qingshuo Wei<sup>4</sup>, Takao Ishida<sup>4</sup>, Atsushi Yamamoto<sup>5</sup>, Akihiro Tsuruta<sup>6</sup>, Woosuck Shin<sup>6</sup>, Sean Li<sup>7</sup>, and Kunihito Koumoto<sup>1,\*</sup>

<sup>1</sup> Toyota Physical and Chemical Research Institute, Nagakute 480-1192, Japan

<sup>2</sup> State Key Laboratory of New Ceramics and Fine Processing, School of Materials Science and Engineering, Tsinghua University, Beijing 100084, China

<sup>3</sup> College of Materials Science and Engineering, Nanjing Tech University, Nanjing 210009, China

<sup>4</sup> Nanomaterials Research Institute, National Institute of Advanced Industrial Science and Technology, Tsukuba, Ibaraki 305-8565, Japan

<sup>5</sup> Research Institute for Energy Conservation, National Institute of Advanced Industrial Science and Technology, Tsukuba, Ibaraki 305-8568, Japan

<sup>6</sup> Inorganic Functional Materials Research Institute, National Institute of Advanced Industrial Science and Technology, Nagoya 463-8560, Japan

<sup>7</sup> School of Materials Science and Engineering, UNSW Australia, NSW 2052, Australia

\*corresponding author: koumoto@toyotariken.jp

#### XRD analysis

XRD measurement has been performed on the mixed TiS<sub>2</sub>/hexylamine (HA) powder after grinding. The experimental result is presented in Fig. s1, which shows that the resultant powder consists of intercalated TiS<sub>2</sub>[HA] phase with larger d-spacing as well as a small amount of un-intercalated TiS<sub>2</sub> phase. Fig. s2 compares the XRD pattern of pristine TiS<sub>2</sub> crystal and as-deposited film, which clearly shows the peak shifting towards low angle direction after organic intercalation.

## **Weight loss**

We have annealed the film sample at 130 °C in vacuum and measured the weight change as a function of annealing time. The result is presented in Fig. s3, which demonstrates the remarkable weight loss during annealing.

## **Evolved gas analysis**

In order to further identify the organic substances and their stability in the film, we have performed the evolved gas analysis by gas chromatography-mass spectrometer (GC-MS). The 6h-annealed sample was scratched from substrate and loaded into a pyrolyzer system (Frontier Lab PY-2020iD) coupled with a GC-MS. The sample was heated up to 600 °C in nitrogen with a heating rate of 15°C/min. The extracted ion chromatograms of m/z 30 and m/z 59 signals are presented in Fig. s4, in which the former can be assigned to hexylamine (HA) and the latter is N-methylformamide (NMF). It clearly shows that most of NMF molecules were removed from the film at temperatures below 300°C, while HA was mainly extracted from the film at temperatures above 300°C, although NMF has a higher boiling point than HA.

## **I-V curves of flexible thermoelectric module**

The I-V curves of our flexible device were recorded by a programmable Keithley 4200-SCS analyzer at different temperature gradient in the range of 10-70K and the result is presented in Fig. s5.

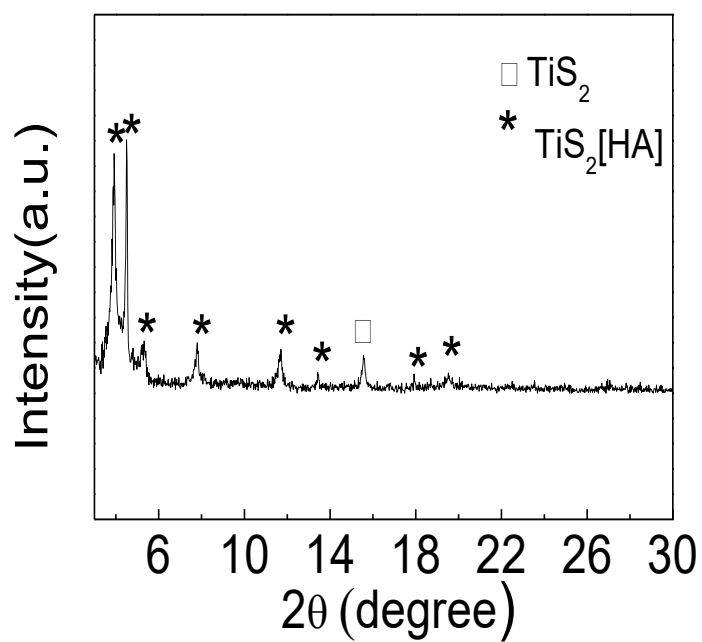

Fig. s1 XRD pattern of mixed  $\text{TiS}_2$  and hexylamine (HA) powder after grinding

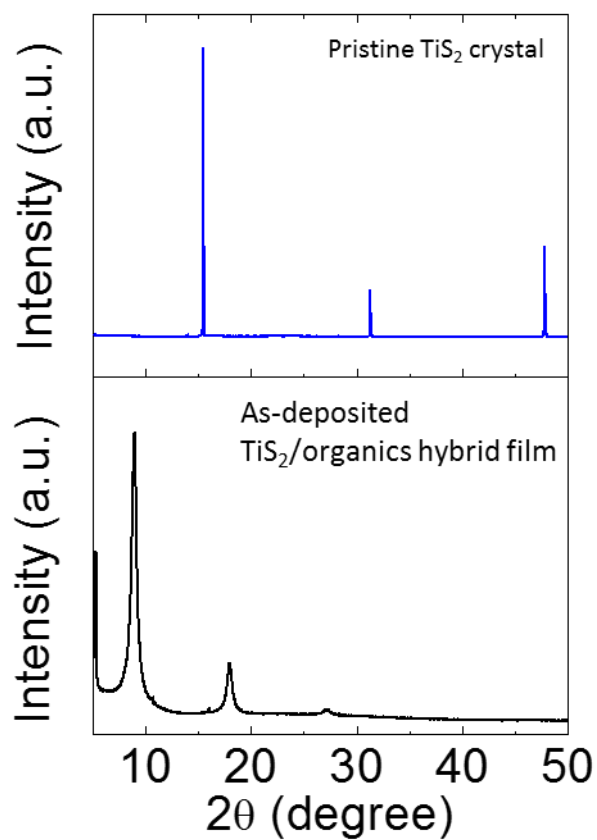

Fig. s2 XRD pattern of pristine  $\text{TiS}_2$  crystal (upper panel) and  $\text{TiS}_2/\text{organics}$  hybrid film (lower panel).

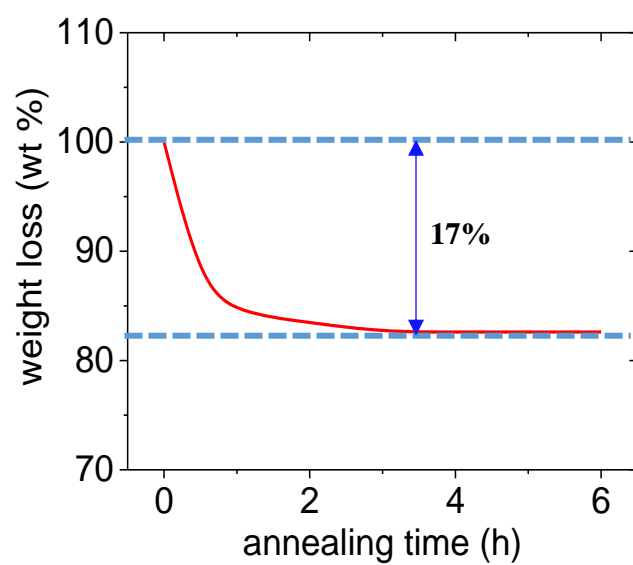

Fig. s3 The weight loss change of as-deposited film as a function of annealing time.

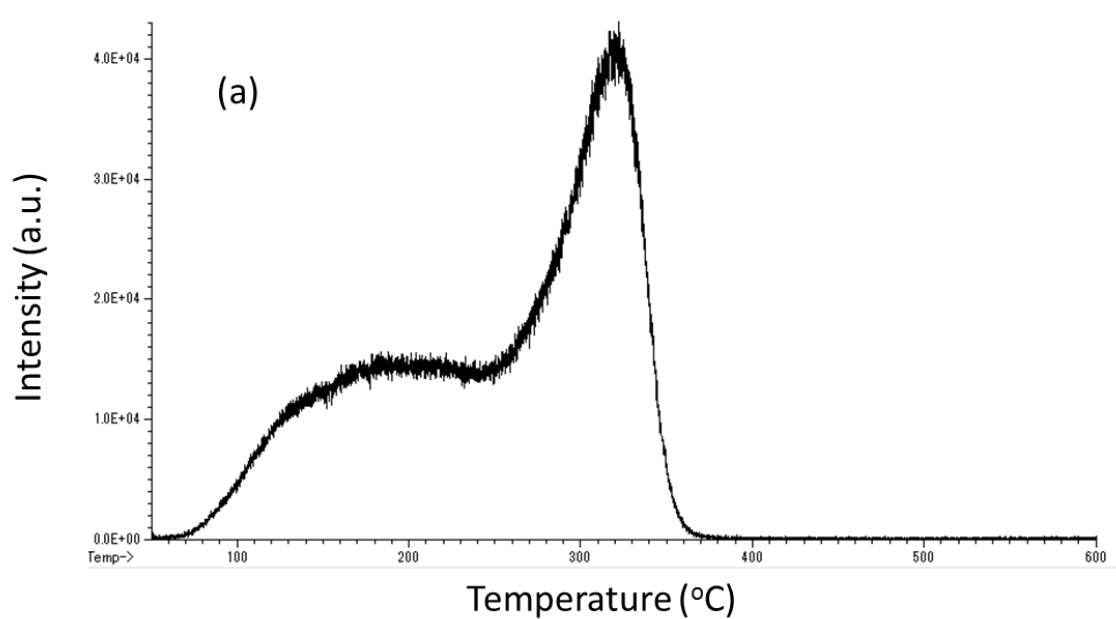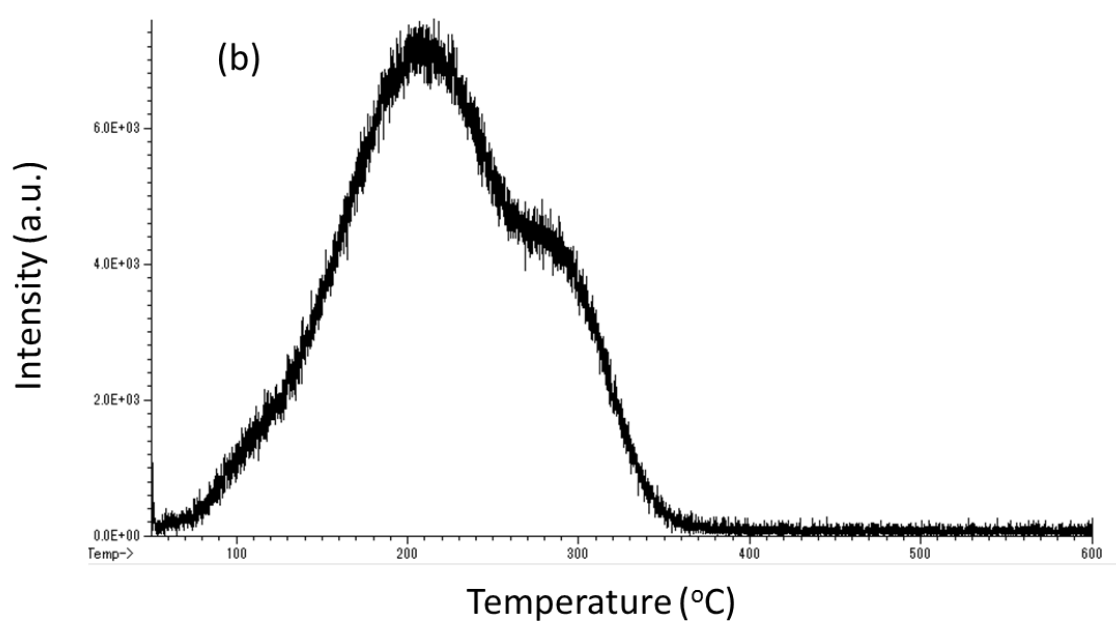

Fig.s4 The extracted ion chromatogram of (a)  $m/z$  30 and (b)  $m/z$  59 signals as a function of temperature.

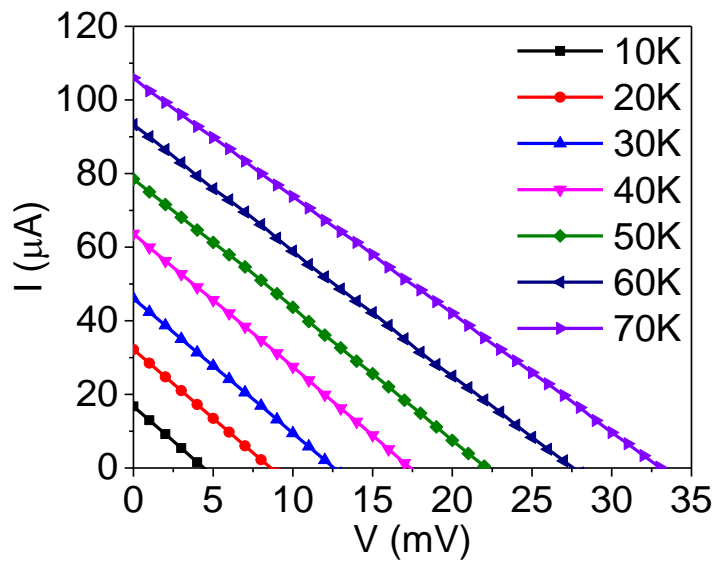

Fig. s5 The measured I-V curves of our flexible thermoelectric module at different temperature gradient.
